# Supplementary material for: Auditing versus monitoring and the role of commitment
Source: Springer Nature journal article supplement (doi:10.1007/s11142-021-09647-z), 2021-10-18
Supplement: MOESM1 [file 19769956]

**Proof of Proposition 1 (No verification).** To prove this proposition take the Lagrangian of problem (P1)

$$\mathcal{L}_1 = \sum_{i=1}^n \pi_i(1) s_i - \lambda \left( \sum_{i=1}^n (\pi_i(1) - \pi_i(0)) s_i - c_H \right) - \sum_{i=1}^n \xi_i s_i.$$

Then the FOCs read as

$$\frac{\partial}{\partial s_i} \mathcal{L}_1 = \pi_i(1) (1 - \lambda(1 - \delta_i)) - \xi_i = 0. \quad (\text{P11})$$

Of course, in equilibrium the agent's incentive constraint is binding. Suppose this constraint would not be binding; that is,  $\lambda = 0$ . Then  $\xi_i > 0$  and, hence  $s_i = 0$  for all  $i = 1, \dots, n$ . But this violates the incentive constraint (ICA), a contradiction. Hence  $\lambda > 0$  in equilibrium. Consider now an outcome with  $\delta_i > 1$ . Then,

$$(1 + \lambda(\delta_i - 1)) > 0;$$

hence  $\xi_i > 0$ , which implies that  $s_i^* = 0$ . Suppose finally that  $s_k^* > 0$  for an outcome with  $\delta_k < 1$  but  $k < n$ . Then  $\xi_k = 0$ ; hence  $\lambda = 1/(1 - \delta_k)$ . However, this implies that, for all outcomes with  $\delta_i < \delta_k$ , the LHS of (P11) is strictly negative; hence the equation cannot be satisfied, a contradiction. Consequently, only  $s_n^* > 0$  and using the incentive constraint

$$s_n^* = \frac{c_H}{\pi_n(1) (1 - \delta_n)}.$$

The principal's expected costs then are

$$\frac{c_H}{(1 - \delta_n)} = \frac{\pi_n(1)}{\pi_n(1) - \pi_n(0)} c_H.$$

Q.E.D. ■

**Proof of Proposition 2 (Auditing).** Suppose that  $(s_{1L}^*, s_{1H}^*, \dots, s_{nL}^*, s_{nH}^*, v_1^*, \dots, v_n^*)$  is a solution of the principal's problem (P2) of minimizing

$$\sum_{i=1}^n \pi_i(1) (p(v_i) s_{iH} + (1 - p(v_i)) s_{iL} + c v_i) \quad \text{such that} \quad (\text{P2})$$

$$\sum_{i=1}^n \pi_i(1) (p(v_i) s_{iH} + (1 - p(v_i)) s_{iL}) - c_H \geq \quad (\text{ICA})$$

$$\sum_{i=1}^n \pi_i(0) (p(v_i) s_{iL} + (1 - p(v_i)) s_{iH})$$

$$\sum_{i=1}^n \pi_i(1) (p(v_i) s_{iH} + (1 - p(v_i)) s_{iL}) - c_H \geq 0. \quad (\text{IRA})$$

The Lagrangian then reads as

$$\begin{aligned}
\mathcal{L}_2 = & \sum_{i=1}^n \pi_i(1) (p(v_i) s_{iH} + (1 - p(v_i)) s_{iL} + cv_i) \\
& - \lambda \left( \sum_{i=1}^n \pi_i(1) (p(v_i) s_{iH} + (1 - p(v_i)) s_{iL}) - c_H \right) \\
& + \lambda \left( \sum_{i=1}^n \pi_i(0) (p(v_i) s_{iL} + (1 - p(v_i)) s_{iH}) \right) \\
& - \sum_{i=1}^n \xi_{iH} s_{iH} - \sum_{i=1}^n \xi_{iL} s_{iL} - \sum_{i=1}^n \xi_{iv} v_i.
\end{aligned}$$

Then the FOCs read as:

$$\frac{\partial}{\partial s_{iH}} \mathcal{L}_2 = \pi_i(1) p(v_i) \left( 1 - \lambda \left( 1 - \delta_i \frac{(1 - p(v_i))}{p(v_i)} \right) \right) - \xi_{iH} = 0 \quad (\text{P21})$$

$$\begin{aligned}
\frac{\partial}{\partial s_{iL}} \mathcal{L}_2 = & \pi_i(1) (1 - p(v_i)) \left( 1 - \lambda \left( 1 - \delta_i \frac{p(v_i)}{(1 - p(v_i))} \right) \right) \\
& - \xi_{iL} = 0 \quad (\text{P22})
\end{aligned}$$

$$\begin{aligned}
\frac{\partial}{\partial v_i} \mathcal{L}_2 = & \pi_i(1) p'(v_i) (s_{iH} - s_{iL}) (1 - \lambda (1 + \delta_i)) + \pi_i(1) c \\
& - \xi_{iv} = 0. \quad (\text{P23})
\end{aligned}$$

I prove the proposition in three steps. First, I show that the incentive constraint must be binding. Second, I prove that it is never optimal to pay the agent if the signal indicates a normal level of effort. And third, I argue that auditing never takes place in two outcomes but only in the one where it is most likely that the agent chose  $e = 1$ .

Step 1: Note that  $\lambda > 0$ , since otherwise,  $s_{iH} = s_{iL} = 0$  for all  $i = 1, \dots, n$  which violates the agent's incentive constraint.

Step 2: Note that

$$\frac{p(v_i)}{(1 - p(v_i))} \geq 1 \geq \frac{(1 - p(v_i))}{p(v_i)}$$

for  $v_i \geq 0$ , with equality signs for  $v_i = 0$ . Hence comparing condition (P21) and (P22) implies that  $s_{iH} \geq s_{iL}$ . Suppose that it is optimal for the principal to verify the agent's behavior in outcome  $x_i$ ; that is,  $v_i > 0$ . Then  $\xi_{iv} > 0$ , and condition (P23) implies  $s_{iH} > s_{iL}$  as well as  $1 < \lambda(1 + \delta_i)$ . But then  $\xi_{iH} = 0$  and (P21) implies

$$0 = 1 - \lambda \left( 1 - \delta_i \frac{(1 - p(v_i))}{p(v_i)} \right) < 1 - \lambda \left( 1 - \delta_i \frac{p(v_i)}{(1 - p(v_i))} \right);$$

hence  $\xi_{iL} > 0$  and  $s_{iL} = 0$ . (P23) then becomes

$$p'(v_i) s_{iH} = \frac{c}{\lambda(1 + \delta_i) - 1}.$$

Step 3: Suppose that there are two outcomes  $x_k < x_j$  such that  $v_i > 0$  and  $v_k > 0$ . Note that  $\delta_j < \delta_k$ . To see that this cannot be part of an equilibrium, note first that (P23) for both outcomes implies

$$p'(v_j) s_{jH} > p'(v_k) s_{kH};$$

hence either  $s_{jH} > s_{kH}$  or  $v_j < v_k$  or both. Suppose that  $v_j > v_k$  and  $s_{jH} > s_{kH}$  such that this inequality is satisfied. Since  $\partial/\partial v [(1 - p(v))/p(v)] = -p'(v)/(p(v))^2 < 0$ , it follows that

$$\begin{aligned} \left(1 - \lambda \left(1 - \delta_k \frac{(1 - p(v_k))}{p(v_k)}\right)\right) &> \left(1 - \lambda \left(1 - \delta_k \frac{(1 - p(v_j))}{p(v_j)}\right)\right) \\ &> \left(1 - \lambda \left(1 - \delta_j \frac{(1 - p(v_j))}{p(v_j)}\right)\right). \end{aligned}$$

Since  $s_{jH} > 0$ , the RHS of this inequality is zero; hence the LHS positive and  $\xi_{kH} > 0$ . This implies  $s_{kH} = 0$ , a contradiction. Hence  $v_j < v_k$ . Consider now the agent's expected utility from  $e = 1$  in the outcomes  $x_j$  and  $x_k$ ,

$$\pi_j(1)p(v_j) s_{jH} + \pi_k(1)p(v_k) s_{kH}$$

and suppose that, instead of auditing in both outcomes, the principal only verifies his behavior in one outcome  $x_j$  with an effort  $v_j$  and rewards the agent in case of a high signal with a payment

$$\tilde{s}_{jH} = s_{jH} + \frac{\pi_k(1)p(v_k)}{\pi_j(1)p(v_j)} s_{kH}.$$

Then the agent's expected utility remains unchanged for  $e = 1$ . Moreover, his expected utility remains unchanged for  $e = 0$ . To see this, note that  $s_j > 0$  and  $s_k > 0$  imply

$$1 - \lambda \left(1 - \delta_k \frac{(1 - p(v_k))}{p(v_k)}\right) = 1 - \lambda \left(1 - \delta_j \frac{(1 - p(v_j))}{p(v_j)}\right)$$

because both sides are zero. Rearranging this equation then implies

$$\pi_k(0)(1 - p(v_k)) s_{kH} = \pi_i(0)(1 - p(v_j)) \frac{\pi_k(1)p(v_k)}{\pi_j(1)p(v_j)} s_{kH},$$

and the agent's expected utility also remains unchanged when not choosing high effort. But then the agent's incentive constraint is still binding, but the principal saves verification costs of  $\pi_k(1)p(v_k)$ . As a consequence, whenever it is optimal to verify the agent's behavior, auditing takes place

only for outcome  $x_n$ . The equilibrium  $s_n > 0$  and  $v_n > 0$  is then characterized by the agent's incentive compatibility constraint as well as by (P21) and (P23) in the form

$$\begin{aligned} p'(v_n^*) s_{nH}^* (\lambda(1 + \delta_n) - 1) &= c, \\ \lambda \left( 1 - \delta_n \frac{(1 - p(v_n^*))}{p(v_n^*)} \right) &= 1, \\ s_{nH}^* \pi_n(1) (p(v_n^*) - \delta_n (1 - p(v_n^*))) &= c_H. \end{aligned}$$

Q.E.D. ■

**Proof of Proposition 3 (Monitoring).** Suppose that  $(s_{1L}^*, s_{1H}^*, \dots, s_{nL}^*, s_{nH}^*, v^*)$  is a solution of the principal's problem (P3):

$$\sum_{i=1}^n \pi_i(1) (p(v) s_{iH} + (1 - p(v)) s_{iL}) + cv \text{ such that} \quad (\text{P3})$$

$$\sum_{i=1}^n \pi_i(1) (p(v) s_{iH} + (1 - p(v)) s_{iL}) - c_H \geq \quad (\text{ICA})$$

$$\sum_{i=1}^n \pi_i(0) (p(v) s_{iL} + (1 - p(v)) s_{iH})$$

$$\sum_{i=1}^n \pi_i(1) (p(v) s_{iH} + (1 - p(v)) s_{iL}) - c_H \geq 0. \quad (\text{IRA})$$

Then the Lagrangian reads as

$$\begin{aligned} \mathcal{L}_3 &= \sum_{i=1}^n \pi_i(1) (p(v) s_{iH} + (1 - p(v)) s_{iL}) + cv \\ &\quad - \lambda \left( \sum_{i=1}^n \pi_i(1) (p(v) s_{iH} + (1 - p(v)) s_{iL}) - c_H \right) \\ &\quad + \lambda \left( \sum_{i=1}^n \pi_i(0) (p(v) s_{iL} + (1 - p(v)) s_{iH}) \right) \\ &\quad - \sum_{i=1}^n \xi_{iH} s_{iH} - \sum_{i=1}^n \xi_{iL} s_{iL} - \xi_v v. \end{aligned}$$

Then the FOCs read as:

$$\frac{\partial}{\partial s_{iH}} \mathcal{L}_3 = \pi_i(1)p(v) \left( 1 - \lambda \left( 1 - \delta_i \frac{(1-p(v))}{p(v)} \right) \right) - \xi_{iH} = 0 \quad (\text{P31})$$

$$\frac{\partial}{\partial s_{iL}} \mathcal{L}_3 = \pi_i(1)(1-p(v)) \left( 1 - \lambda \left( 1 - \delta_i \frac{p(v)}{(1-p(v))} \right) \right) - \xi_{iL} = 0 \quad (\text{P32})$$

$$\frac{\partial}{\partial v} \mathcal{L}_3 = p'(v) \sum_{i=1}^n \pi_i(1)(s_{iH} - s_{iL}) \left( 1 - \lambda \left( 1 + \frac{\sum_{i=1}^n \pi_i(0)(s_{iH} - s_{iL})}{\sum_{i=1}^n \pi_i(1)(s_{iH} - s_{iL})} \right) \right) + c - \xi_v = 0. \quad (\text{P33})$$

The proposition is shown as follows. First, I show that the agent's incentive constraint is binding. Second, assuming monitoring takes place, I argue that the principal never pays a reward when the signal indicates normal effort. And third, a positive reward if the signal shows  $e = 1$  is only paid in the highest outcome.

Step 1: Suppose that the incentive constraint would not be binding; that is,  $\lambda = 0$ . Then (P31) and (P32) imply that  $\xi_{iH} > 0$  and  $\xi_{iL} > 0$ ; hence  $s_{iH} = s_{iL} = 0$  for all  $i = 1, \dots, n$ . Then, however, the agent's incentive constraint cannot be satisfied, a contradiction. As a result,  $\lambda > 0$ .

Step 2: Moreover, whenever  $v > 0$

$$\frac{p(v)}{(1-p(v))} > 1 > \frac{(1-p(v))}{p(v)}.$$

Hence the RHS of condition (P31) is always greater than the RHS of (P32), implying that  $s_{iH} \geq s_{iL}$ . Moreover,  $v > 0$  implies  $\xi_v > 0$ , and condition (P33) implies  $s_{iH} > s_{iL}$  as well as  $1 < \lambda(1 + \delta_i)$ . But then  $\xi_{iH} = 0$  and (P31) imply

$$0 = 1 - \lambda \left( 1 - \delta_i \frac{(1-p(v))}{p(v)} \right) < 1 - \lambda \left( 1 - \delta_i \frac{p(v)}{(1-p(v))} \right);$$

hence  $\xi_{iL} > 0$  and  $s_{iL} = 0$ .

Step 3: Suppose finally that  $s_{kH} > 0$  for an outcome with  $\delta_k$  with  $k < n$ . Then  $\xi_{kH} = 0$ ; hence

$$\lambda = 1 / \left( 1 - \delta_k \frac{(1-p(v))}{p(v)} \right).$$

Then, for all outcomes with  $\delta_i < \delta_k$ , the LHS of (P31) is strictly negative,

$$\left( 1 - \lambda \left( 1 - \delta_i \frac{(1-p(v))}{p(v)} \right) \right) = \left( 1 - \frac{\left( 1 - \delta_i \frac{(1-p(v))}{p(v)} \right)}{\left( 1 - \delta_k \frac{(1-p(v))}{p(v)} \right)} \right) < 0;$$

hence condition (P31) cannot be satisfied, a contradiction. Consequently, only  $s_{nH} > 0$ . The equilibrium with  $v > 0$  then is characterized by

$$\begin{aligned}\lambda \left( 1 - \delta_n \frac{(1-p(v))}{p(v)} \right) &= 1, \\ p'(v^*) s_{nH} (\lambda(1 + \delta_n) - 1) &= \frac{c}{\pi_n(1)}, \\ s_{nH} \pi_n(1) (p(v) - \delta_n(1 - p(v))) &= c_H.\end{aligned}$$

Note that the characterization of  $v^*$  reads as

$$\frac{c_H}{\frac{c}{\pi_n(1)}} = \frac{\pi_n(1)^2 (p(v^*) - \delta_n(1 - p(v^*)))^2}{\pi_n(0)p'(v^*)}.$$

The RHS as a function of  $v^*$  then is identical to the characterization of  $v_n^*$  in the case of auditing, but the LHS indicates higher costs of verification compared to the case of auditing. Since the optimal verification effort under auditing is decreasing in  $c$ , the optimal effort  $v^*$  under monitoring is lower than the optimal effort  $v_n^*$  under auditing.

Q.E.D. ■
